# Supplementary material for: Evaluation of a large language model to simplify discharge summaries and provide cardiological lifestyle recommendations
Source: Springer Nature journal article supplement (doi:10.1038/s43856-025-00927-2), 2025-05-29
Supplement: MOESM1 [file 43856_2025_927_MOESM1_ESM.pdf]

## Supplementary Material

**Supplementary Figure 1.** Example of lifestyle recommendations generated by the large language model from one of the discharge summaries (translated from German).

**Supplementary Table 1.** Prompts used to generate simplified discharge summaries.

**Supplementary Table 2.** Prompt used to generate lifestyle recommendations.

**Supplementary Table 3.** Survey statements for assessing the quality of the simplifications and lifestyle recommendations generated by the large language model.

**Supplementary Table 4.** Quality categories used in previous studies for assessing the quality of simplifications generated by large language models.

**Supplementary Table 5.** Overview of original discharge summaries including primary diagnoses, number of secondary diagnoses, type of hospitals, readability and word count.

**Supplementary Table 6.** Exploratory questions to assess medical experts' opinions on patients' interest in understanding discharge reports, the comprehensibility of current discharge reports and the importance of including lifestyle recommendations.

**Supplementary Table 7.** Exploratory questions to assess medical experts' opinions on the prevalence of lifestyle recommendations in current discharge reports and patients' interest in these recommendations.

**Supplementary Table 8.** Exploratory questions to assess the medical experts' behavioral intentions regarding the use of large language models in clinical practice.

**Supplementary References**

**Supplementary Figure 1.** Example of lifestyle recommendations generated by the large language model from one of the discharge summaries (translated from German).

### 1. Blood Pressure Control

Since you suffer from high blood pressure and have already experienced a hypertensive crisis, it is important to regularly monitor and stabilize your blood pressure.

- **Blood Pressure Diary:** Measure your blood pressure daily in the morning and evening at the same time. Record the readings in a blood pressure diary.
- **Medication:** Take your Ramipril tablet every day at 8:00 AM. Do not discontinue the medication without consulting your doctor first.
- **Salt Reduction:** Reduce your salt intake. Use herbs and spices instead of salt to season your food.
- **Regular Check-ups:** Visit your doctor regularly to check your blood pressure and overall health.

### 2. Healthy Diet

A balanced diet can help lower your blood pressure and keep your heart healthy.

- **Fruits and Vegetables:** Eat at least five servings of fruits and vegetables daily.
- **Whole Grains:** Choose whole grain products like whole grain bread, oatmeal, and brown rice.
- **Low-fat Dairy Products:** Prefer low-fat or fat-free dairy products.
- **Healthy Fats:** Use vegetable oils like olive oil and eat fatty fish like salmon and mackerel twice a week.
- **Reduce Sugar:** Avoid sugary drinks and sweets.

### 3. Regular Exercise

Regular physical activity strengthens the heart and improves blood pressure.

- **Daily Activity:** Walk for at least 30 minutes every day. Use the stairs instead of the elevator.
- **Sports:** Swimming, cycling, or light jogging are good for your heart. Try to exercise three times a week.
- **Heart-Friendly Exercises:** Practice exercises like yoga or Pilates, which are relaxing and can reduce stress.

### 4. Weight Control

Maintaining a healthy body weight relieves stress on your heart and helps regulate blood pressure.

- **Healthy Diet:** Follow the dietary recommendations mentioned above.
- **Regular Exercise:** Combine endurance training with muscle-strengthening exercises.
- **Target Weight:** Discuss a healthy target weight with your doctor and the best ways to achieve it.

### 5. Stress Management

Stress can increase blood pressure. It is important to develop strategies for managing stress.

- **Relaxation Techniques:** Regularly practice relaxation techniques such as meditation, breathing exercises, or progressive muscle relaxation.
- **Time for Yourself:** Take time each day for activities that bring you joy and relaxation.
- **Social Support:** Talk to family and friends about your feelings and seek support when you need it.

### 6. Smoking Cessation and Alcohol Consumption

Smoking and excessive alcohol consumption are risk factors for cardiovascular diseases.

- **Quit Smoking:** If you smoke, seek support to quit. There are various programs and tools that can help you.
- **Alcohol Consumption:** Drink alcohol in moderation. This means no more than one glass of wine or beer per day for women and two glasses for men.

### 7. Regular Medical Check-ups

Your health condition requires regular medical check-ups to ensure your treatment is optimal.

- **Doctor Visits:** Regularly visit your cardiologist and general practitioner to monitor your health.
- **Blood Tests:** Have regular blood tests to monitor your levels.

### 8. Skincare for Psoriasis

Psoriasis can be worsened by stress and certain triggers. Good skincare is important.

- **Moisturizing:** Use moisturizing creams or ointments daily.
- **Avoiding Triggers:** Identify and avoid triggers that may worsen your psoriasis, such as certain foods or stress.
- **Medication:** Take your prescribed psoriasis medications regularly and consult your dermatologist if needed.

**Supplementary Table 1.** Prompts used to generate simplified discharge summaries.

| Prompt       | Original Wording (German)                                                                                                                                                                                                                                                                                                                                                                                                                                                                                                                                                                                                                                                                                          | Translation (English)                                                                                                                                                                                                                                                                                                                                                                                                                                                                                                                                                                        |
|--------------|--------------------------------------------------------------------------------------------------------------------------------------------------------------------------------------------------------------------------------------------------------------------------------------------------------------------------------------------------------------------------------------------------------------------------------------------------------------------------------------------------------------------------------------------------------------------------------------------------------------------------------------------------------------------------------------------------------------------|----------------------------------------------------------------------------------------------------------------------------------------------------------------------------------------------------------------------------------------------------------------------------------------------------------------------------------------------------------------------------------------------------------------------------------------------------------------------------------------------------------------------------------------------------------------------------------------------|
| Full-text    | <Aufgabe><br>Du erhältst einen kardiologischen Arztbrief aus einem Krankenhaus. Bitte erkläre dem Patienten bzw. der Patientin den Arztbrief in laienverständlicher Sprache.                                                                                                                                                                                                                                                                                                                                                                                                                                                                                                                                       | <Task><br>You will receive a cardiology medical report from a hospital. Please explain the report to the patient in layman's terms.                                                                                                                                                                                                                                                                                                                                                                                                                                                          |
|              | Halte dich dabei an folgende Anweisungen:<br><ul style="list-style-type: none"> <li>• Verzichte auf medizinische Fachwörter und verwende stattdessen allgemein verständlich Begriffe.</li> <li>• Erkläre medizinische Konzepte und Zusammenhänge so ausführlich, dass ein Patient oder eine Patientin ohne medizinisches Wissen sie leicht nachvollziehen kann.</li> <li>• Verwende einfaches Deutsch, das auch Personen mit geringer Lesekompetenz verstehen können.</li> <li>• Richte deine Erklärung direkt an den Patienten oder die Patientin und verwende „Sie“.</li> <li>• Verzichte auf eine Anrede oder Verabschiedung.</li> <li>• Deine Antwort sollte ausführlich und gut strukturiert sein.</li> </ul> | Follow these instructions:<br><ul style="list-style-type: none"> <li>• Avoid using medical jargon and instead use terms that are easy to understand.</li> <li>• Explain medical concepts and connections in detail so that a patient without medical knowledge can easily follow them.</li> <li>• Use simple language that can be understood by people with low literacy.</li> <li>• Direct your explanation to the patient and use “You” (polite).</li> <li>• Do not include a salutation or closing.</li> <li>• Your response should be detailed and well-structured.</li> </ul>           |
|              | Gehe Schritt für Schritt vor.<br><Kardiologischer Arztbrief>                                                                                                                                                                                                                                                                                                                                                                                                                                                                                                                                                                                                                                                       | Proceed step by step.<br><Cardiology Medical Report>                                                                                                                                                                                                                                                                                                                                                                                                                                                                                                                                         |
| Segment-wise | <Aufgabe><br>Du erhältst ein Abschnitt aus einem kardiologischen Arztbrief aus einem Krankenhaus. Bitte erkläre dem Patienten bzw. der Patientin den Abschnitt in laienverständlicher Sprache.                                                                                                                                                                                                                                                                                                                                                                                                                                                                                                                     | <Task><br>You receive a section from a cardiology medical report from a hospital. Please explain the section to the patient in layman's terms.                                                                                                                                                                                                                                                                                                                                                                                                                                               |
|              | Halte dich dabei an folgende Anweisungen:<br><ul style="list-style-type: none"> <li>• Verzichte auf medizinische Fachwörter und verwende stattdessen allgemein verständlich Begriffe.</li> <li>• Erkläre medizinische Konzepte und Zusammenhänge so ausführlich, dass ein Patient oder eine Patientin ohne medizinisches Wissen sie leicht nachvollziehen kann.</li> <li>• Verwende einfaches Deutsch, das auch Personen mit geringer Lesekompetenz verstehen können.</li> <li>• Richte deine Erklärung direkt an den Patienten oder die Patientin und verwende „Sie“.</li> <li>• Verzichte auf eine Anrede oder Verabschiedung.</li> <li>• Deine Antwort sollte ausführlich und gut strukturiert sein.</li> </ul> | Follow these instructions:<br><ul style="list-style-type: none"> <li>• Avoid using medical jargon and instead use terms that are easy to understand.</li> <li>• Explain medical concepts and connections in detail so that a patient without medical knowledge can easily understand them.</li> <li>• Use simple language that can be understood by people with low reading skills.</li> <li>• Direct your explanation to the patient and use “You” (polite).</li> <li>• Do not include a salutation or closing.</li> <li>• Your response should be detailed and well-structured.</li> </ul> |
|              | Gehe Schritt für Schritt vor.<br><Abschnitt Kardiologischer Arztbrief>                                                                                                                                                                                                                                                                                                                                                                                                                                                                                                                                                                                                                                             | Proceed step by step.<br><Section of the Cardiology Medical Report>                                                                                                                                                                                                                                                                                                                                                                                                                                                                                                                          |

**Supplementary Table 2.** Prompt used to generate lifestyle recommendations.

| Prompt         | Original Wording (German)                                                                                                                                                                                                                                                                                                                                                                                                                                                                                                                                                                                                                                                                                                                                                                                                 | Translation (English)                                                                                                                                                                                                                                                                                                                                                                                                                                                                                                                                                                                                                                                                                   |
|----------------|---------------------------------------------------------------------------------------------------------------------------------------------------------------------------------------------------------------------------------------------------------------------------------------------------------------------------------------------------------------------------------------------------------------------------------------------------------------------------------------------------------------------------------------------------------------------------------------------------------------------------------------------------------------------------------------------------------------------------------------------------------------------------------------------------------------------------|---------------------------------------------------------------------------------------------------------------------------------------------------------------------------------------------------------------------------------------------------------------------------------------------------------------------------------------------------------------------------------------------------------------------------------------------------------------------------------------------------------------------------------------------------------------------------------------------------------------------------------------------------------------------------------------------------------|
| Recommendation | <Aufgabe><br>Erstelle maßgeschneiderte Lebensstilempfehlungen basierend auf den detaillierten Angaben des folgenden kardiologischen Arztbriefes.                                                                                                                                                                                                                                                                                                                                                                                                                                                                                                                                                                                                                                                                          | <Task><br>Create customized lifestyle recommendations based on the detailed information in the following cardiology medical report.                                                                                                                                                                                                                                                                                                                                                                                                                                                                                                                                                                     |
|                | Bitte berücksichtige dabei:                                                                                                                                                                                                                                                                                                                                                                                                                                                                                                                                                                                                                                                                                                                                                                                               | Please consider the following:                                                                                                                                                                                                                                                                                                                                                                                                                                                                                                                                                                                                                                                                          |
|                | <ul style="list-style-type: none"> <li>• Orientiere dich an den aktuellen Leitlinien und Empfehlungen renommierter medizinischer Fachgesellschaften</li> <li>• Passe die Lebensstilempfehlungen spezifisch an den individuellen Gesundheitszustand und die Bedürfnisse des Patienten bzw. der Patientin an.</li> <li>• Verwende einfaches Deutsch, das auch Personen mit geringer Lesekompetenz verstehen können.</li> <li>• Formuliere die Empfehlungen detailliert, präzise und in einer für Laien verständlichen Sprache, um eine leichte Umsetzbarkeit zu gewährleisten.</li> <li>• Richte deine Erklärung direkt an den Patienten oder die Patientin und verwende „Sie“.</li> <li>• Verzichte auf eine Anrede oder Verabschiedung.</li> <li>• Deine Antwort sollte ausführlich und gut strukturiert sein.</li> </ul> | <ul style="list-style-type: none"> <li>• Base your advice on the current guidelines and recommendations of reputable medical societies.</li> <li>• Tailor the lifestyle recommendations specifically to the patient's individual health condition and needs.</li> <li>• Use simple language that can be understood by people with low reading skills.</li> <li>• Formulate the recommendations in a detailed, precise, and easy-to-understand manner to ensure they can be easily implemented.</li> <li>• Direct your explanation to the patient and use “You” (polite).</li> <li>• Do not include a salutation or closing.</li> <li>• Your response should be detailed and well-structured.</li> </ul> |
|                | Gehe Schritt für Schritt vor.                                                                                                                                                                                                                                                                                                                                                                                                                                                                                                                                                                                                                                                                                                                                                                                             | Proceed step by step.                                                                                                                                                                                                                                                                                                                                                                                                                                                                                                                                                                                                                                                                                   |
|                | <Kardiologischer Arztbrief>                                                                                                                                                                                                                                                                                                                                                                                                                                                                                                                                                                                                                                                                                                                                                                                               | <Cardiology Medical Report>                                                                                                                                                                                                                                                                                                                                                                                                                                                                                                                                                                                                                                                                             |

**Supplementary Table 3.** Survey statements for assessing the quality of the simplifications and lifestyle recommendations generated by the large language model

| Output                          | Quality category  | Question                                                                                                                                                    |
|---------------------------------|-------------------|-------------------------------------------------------------------------------------------------------------------------------------------------------------|
| <b>Simplification</b>           | Correctness       | The patient letter is a factually accurate translation of the original letter.                                                                              |
|                                 | Completeness      | The patient letter includes all the relevant medical information from the original discharge letter necessary for the patient.                              |
|                                 | Harmlessness      | The patient letter contains no incorrect or misleading information that could lead to physical or psychological harm.                                       |
|                                 | Comprehensibility | The patient letter uses terms, expressions, and a language that are easily understood by the average patient.                                               |
| <b>Lifestyle recommendation</b> | Relevance         | The lifestyle recommendations are relevant for the patient.                                                                                                 |
|                                 | Evidence base     | The lifestyle recommendations follow current clinical guidelines and/or are based on medically established practices.                                       |
|                                 | Personalization   | The lifestyle recommendations are personalized and take the patient's specific state of health into account as to the extent apparent.                      |
|                                 | Completeness      | The lifestyle recommendations cover all lifestyle aspects that are necessary for the prevention, treatment or management of the patient's specific disease. |
|                                 | Consistency       | The lifestyle recommendations are consistent with each other.                                                                                               |
|                                 | Harmlessness      | The lifestyle recommendations contain no incorrect or misleading information that could lead to physical or psychological harm.                             |

**Note.** All statements were translated from German and assessed using a 5-point Likert scale (1 = Strongly disagree; 5 = Strongly agree).

**Supplementary Table 4.** Quality categories used in previous studies for assessing the quality of simplifications generated by large language models.

| Study                       | Field                    | Quality measurements                                                                                                                                                                                                                                                                                                                                                                                                                                                                                                                                                                                                                                                                                                                                                                                                                                                                                                                                                                                                                                                                                           |
|-----------------------------|--------------------------|----------------------------------------------------------------------------------------------------------------------------------------------------------------------------------------------------------------------------------------------------------------------------------------------------------------------------------------------------------------------------------------------------------------------------------------------------------------------------------------------------------------------------------------------------------------------------------------------------------------------------------------------------------------------------------------------------------------------------------------------------------------------------------------------------------------------------------------------------------------------------------------------------------------------------------------------------------------------------------------------------------------------------------------------------------------------------------------------------------------|
| Ali et al. <sup>1</sup>     | Dermatology              | <p><i>Assessed by medical professionals:</i></p> <ul style="list-style-type: none"> <li>• Factual correctness (10-point Likert scale)</li> <li>• Humanness (10-point Likert scale)</li> </ul>                                                                                                                                                                                                                                                                                                                                                                                                                                                                                                                                                                                                                                                                                                                                                                                                                                                                                                                  |
| Schmidt et al. <sup>2</sup> | Radiology                | <p><i>Assessed by medical professionals:</i></p> <ul style="list-style-type: none"> <li>• Factual correctness (5-point Likert scale)</li> <li>• Presence of relevant medical information (5-point Likert scale)</li> <li>• Simplicity and understandability (5-point Likert scale)</li> <li>• Potentially incorrect conclusions or harmfulness (5-point Likert scale)</li> </ul> <p><i>Assessed by non-medical personnel:</i></p> <ul style="list-style-type: none"> <li>• Simplicity and understandability of words (5-point Likert scale)</li> <li>• Simplicity and understandability of sentences (5-point Likert scale)</li> <li>• High density of information (5-point Likert scale)</li> <li>• Knowing what the text is about (5-point Likert scale)</li> <li>• Wishing that the text was clearer about importance (5-point Likert scale)</li> <li>• Ability to draw the right conclusions (5-point Likert scale)</li> <li>• Text informed as well as a healthcare professional (5-point Likert scale)</li> <li>• Full understanding of what the injury or illness was (5-point Likert scale)</li> </ul> |
| Jeblick et al. <sup>3</sup> | Radiology                | <p><i>Assessed by medical professionals:</i></p> <ul style="list-style-type: none"> <li>• Factual correctness (5-point Likert scale)</li> <li>• Completeness (5-point Likert scale)</li> <li>• Potential harm (5-point Likert scale)</li> </ul>                                                                                                                                                                                                                                                                                                                                                                                                                                                                                                                                                                                                                                                                                                                                                                                                                                                                |
| Chung et al. <sup>4</sup>   | Radiology/<br>Oncology   | <p><i>Assessed by medical professionals:</i></p> <ul style="list-style-type: none"> <li>• Factual correctness (5-point Likert scale)</li> <li>• Understanding (5-point Likert scale)</li> <li>• Completeness (5-point Likert scale)</li> <li>• Potential for harm (5-point Likert scale)</li> <li>• Overall quality (5-point Likert scale)</li> <li>• Likelihood to send to patient (5-point Likert scale)</li> </ul>                                                                                                                                                                                                                                                                                                                                                                                                                                                                                                                                                                                                                                                                                          |
| Salam et al. <sup>5</sup>   | Radiology/<br>Cardiology | <p><i>Assessed by medical professionals:</i></p> <ul style="list-style-type: none"> <li>• Factual correctness (5-point Likert scale)</li> <li>• Completeness (5-point Likert scale)</li> <li>• Serious misinformation with potential harm (5-point Likert scale)</li> </ul> <p><i>Assessed by non-medical personnel:</i></p> <ul style="list-style-type: none"> <li>• Understandability (5-point Likert scale)</li> </ul>                                                                                                                                                                                                                                                                                                                                                                                                                                                                                                                                                                                                                                                                                      |
| Kim et al. <sup>6</sup>     | Cardiology/<br>Surgery   | <p><i>Assessed by doctors or nurses:</i></p> <ul style="list-style-type: none"> <li>• Factuality (5-point Likert scale)</li> <li>• Comprehensiveness (5-point Likert scale)</li> <li>• Usability</li> </ul> <p><i>Assessed by non-medical personnel:</i></p> <ul style="list-style-type: none"> <li>• Ease (5-point Likert scale)</li> <li>• Fluency (5-point Likert scale)</li> </ul>                                                                                                                                                                                                                                                                                                                                                                                                                                                                                                                                                                                                                                                                                                                         |

**Supplementary Table 5.** Overview of original discharge summaries including primary diagnoses, number of secondary diagnoses, type of hospitals, readability and word count.

| Letter | Primary diagnosis                                         | No. of secondary diagnoses | Hospital | Type of hospital | FRE-Amstad | LIX  | WSTF | Word count |
|--------|-----------------------------------------------------------|----------------------------|----------|------------------|------------|------|------|------------|
| 1      | Pulmonary embolism                                        | 2                          | 1        | General          | 30.6       | 50.9 | 12.3 | 181        |
| 2      | Heart failure                                             | 5                          | 2        | Specialty        | 4.0        | 62.2 | 15.0 | 266        |
| 3      | Acute myocardial infarction                               | 3                          | 3        | University       | 10.9       | 56.6 | 14.6 | 154        |
| 4      | Chronic ischemic heart disease                            | 4                          | 3        | University       | 17.0       | 56.1 | 14.1 | 380        |
| 5      | Medical observation and evaluation for suspected diseases | 3                          | 3        | University       | 3.7        | 62.7 | 15.0 | 326        |
| 6      | Chronic ischemic heart disease                            | 4                          | 3        | University       | 18.5       | 54.8 | 13.5 | 378        |
| 7      | Rheumatic mitral valve diseases                           | 7                          | 3        | University       | 14.7       | 58.4 | 14.4 | 318        |
| 8      | Chronic ischemic heart disease                            | 5                          | 4        | General          | 28.2       | 52.3 | 12.9 | 243        |
| 9      | Transplanted organ and tissue status                      | 2                          | 5        | Specialty        | 34.2       | 50.9 | 11.8 | 327        |
| 10     | Chronic ischemic heart disease                            | 0                          | 3        | University       | 6.5        | 61.5 | 15.0 | 126        |
| 11     | Atrial fibrillation and flutter                           | 1                          | 6        | General          | 0.0        | 64.0 | 15.0 | 95         |
| 12     | Occlusion and stenosis of precerebral arteries            | 3                          | 6        | General          | 22.4       | 55.4 | 13.7 | 190        |
| 13     | Chronic ischemic heart disease                            | 2                          | 3        | University       | 25.1       | 50.9 | 12.4 | 336        |
| 14     | Chronic ischemic heart disease                            | 5                          | 1        | General          | 28.6       | 51.5 | 12.2 | 234        |
| 15     | Chronic ischemic heart disease                            | 4                          | 7        | General          | 28.3       | 54.6 | 13.3 | 367        |
| 16     | Heart failure                                             | 4                          | 3        | University       | 0.0        | 62.4 | 15.0 | 341        |
| 17     | Chronic ischemic heart disease                            | 1                          | 8        | University       | 29.8       | 53.4 | 13.0 | 408        |
| 18     | Heart failure                                             | 3                          | 2        | Specialty        | 0.1        | 65.3 | 15.0 | 186        |
| 19     | Atrial fibrillation and flutter                           | 4                          | 9        | General          | 31.1       | 51.0 | 12.2 | 308        |
| 20     | Atrial fibrillation and flutter                           | 1                          | 6        | General          | 7.7        | 60.4 | 15.0 | 204        |

**Note.** For the modified Flesch-Reading-Ease (FRE-Amstad), higher scores indicate better readability. For the Vienna Non-fiction Text Formula (WSTF) and the Lesbarkeitsindex (LIX), lower scores reflect better readability.

**Supplementary Table 6.** Exploratory questions to assess medical experts' opinions on patients' interest in understanding discharge reports, the comprehensibility of current discharge reports and the importance of including lifestyle recommendations.

| Question                                                                                                          | Median | Q1  | Q3  | IQR | Mean | SD  | Min | Max |
|-------------------------------------------------------------------------------------------------------------------|--------|-----|-----|-----|------|-----|-----|-----|
| How would you assess the average interest of patients in understanding their discharge letter?                    | 4.0    | 3.0 | 4.0 | 1.0 | 3.9  | 0.7 | 3.0 | 5.0 |
| How would you assess the comprehensibility of average discharge letters from the perspective of patients?         | 2.0    | 1.0 | 2.0 | 1.0 | 1.6  | 0.6 | 1.0 | 3.0 |
| How would you assess the importance of integrating lifestyle recommendations into discharge letters for patients? | 4.0    | 3.0 | 5.0 | 2.0 | 4.0  | 1.1 | 2.0 | 5.0 |

**Note.**  $N = 11$  experts responded to these questions using a 5-point Likert scale (1 = Very low; 5 = Very high). The questions were translated from German. Q1 = 25%-quantile; Q3 = 75%-quantile; IQR = interquartile range; Min = minimum; Max = maximum;  $SD$  = standard deviation.

**Supplementary Table 7.** Exploratory questions to assess medical experts' opinions on the prevalence of lifestyle recommendations in current discharge reports and patients' interest in these recommendations

| Question                                                                                                                                                                                                                                                                                       | Median | Q1   | Q3   | IQR  | Mean | SD      | Min  | Max  |
|------------------------------------------------------------------------------------------------------------------------------------------------------------------------------------------------------------------------------------------------------------------------------------------------|--------|------|------|------|------|---------|------|------|
| How high do you estimate the proportion (0-100%) of discharge letters that contain lifestyle recommendations in relation to all cardiology discharge letters?<br>(0% = No discharge letter contains lifestyle recommendations; 100% = All discharge letters contain lifestyle recommendations) | 24.0   | 20.0 | 52.5 | 32.5 | 34.2 | 21.6 pp | 10.0 | 70.0 |
| How high do you estimate the proportion (0-100%) of patients who express interest in lifestyle recommendations compared to the total number of patients?<br>(0% = No patient is interested; 100% = All patients are interested)                                                                | 60.0   | 48.3 | 69.8 | 21.5 | 55.8 | 20.9 pp | 10.0 | 80.0 |

**Note.**  $N = 12$  experts responded to these questions using a sliding scale with endpoints at 0% and 100% (in 1% increments). The questions were translated from German. Q1 = 25%-quantile; Q3 = 75%-quantile; IQR = interquartile range; Min = minimum; Max = maximum;  $SD$  = standard deviation; pp = percentage points.



**Supplementary Table 8.** Exploratory questions to assess the medical experts' behavioral intentions regarding the use of large language models in clinical practice

| Question                                                                                                    | Median | Q1  | Q3  | IQR | Mean | SD  | Min | Max |
|-------------------------------------------------------------------------------------------------------------|--------|-----|-----|-----|------|-----|-----|-----|
| If a large language model is used to generate simplified patient letters in my hospital/clinic/practice,... |        |     |     |     |      |     |     |     |
| ...I would intend to use the large language model.                                                          | 5.0    | 4.8 | 5.0 | 0.3 | 4.7  | 0.6 | 3.0 | 5.0 |
| ...I would use the large language model.                                                                    | 5.0    | 4.8 | 5.0 | 0.3 | 4.7  | 0.6 | 3.0 | 5.0 |
| ...I plan to use the large language model.                                                                  | 5.0    | 4.0 | 5.0 | 1.0 | 4.6  | 0.6 | 3.0 | 5.0 |

**Note.**  $N = 12$  experts responded to these questions using a 5-point Likert scale (1 = Strongly disagree; 5 = Strongly agree). The questions were based on the measurement of behavioral intentions from the Unified Theory of Acceptance and Use of Technology 2<sup>7</sup> and were translated from German. Q1 = 25%-quantile; Q3 = 75%-quantile; IQR = interquartile range; Min = minimum; Max = maximum; SD = standard deviation.

## References

1. Ali, S. R., Dobbs, T. D., Hutchings, H. A. & Whitaker, I. S. Using ChatGPT to write patient clinic letters. *The Lancet. Digital health* **5**, e179-e181; 10.1016/S2589-7500(23)00048-1 (2023).
2. Schmidt, S., Zimmerer, A., Cucos, T., Feucht, M. & Navas, L. Simplifying radiologic reports with natural language processing: a novel approach using ChatGPT in enhancing patient understanding of MRI results. *Arch Orthop Trauma Surg* **144**, 611–618; 10.1007/s00402-023-05113-4 (2024).
3. Jeblick, K. *et al.* ChatGPT makes medicine easy to swallow: an exploratory case study on simplified radiology reports. *European radiology* **34**, 2817–2825; 10.1007/s00330-023-10213-1 (2024).
4. Chung, E. M. *et al.* Feasibility and acceptability of ChatGPT generated radiology report summaries for cancer patients. *Digital health* **9**, 20552076231221620; 10.1177/20552076231221620 (2023).
5. Salam, B. *et al.* Generative Pre-trained Transformer 4 makes cardiovascular magnetic resonance reports easy to understand. *Journal of cardiovascular magnetic resonance : official journal of the Society for Cardiovascular Magnetic Resonance* **26**, 101035; 10.1016/j.jocmr.2024.101035 (2024).
6. Kim, H., Jin, H. M., Jung, Y. B. & You, S. C. Patient-Friendly Discharge Summaries in Korea Based on ChatGPT: Software Development and Validation. *Journal of Korean medical science* **39**, e148; 10.3346/jkms.2024.39.e148 (2024).
7. Venkatesh, Thong & Xu. Consumer Acceptance and Use of Information Technology: Extending the Unified Theory of Acceptance and Use of Technology. *MIS Quarterly* **36**, 157; 10.2307/41410412 (2012).
